# Supplementary material
Source: MDPI journal article supplement (https://www.mdpi.com/2076-3417/11/20/9484)
Supplement: s1 [file s1]

**Table S1.** Raw data of translational kinetic energy (J/kg) of all included vaults (Yu: Yurchenko; Tsuk: Tsukahara; ° of rotation: Degrees of rotation around longitudinal axis during the second flight phase).

| Vault style | ° of rotation | Board on | Board off | Table on | Table off | 2nd max | Landing |
|-------------|---------------|----------|-----------|----------|-----------|---------|---------|
| Yu          | 0             |          | 16.02     | 13.21    | 6.86      | 21.78   | 21.78   |
| Yu          | 0             | 19.17    | 17.95     | 15.18    | 6.54      | 23.80   | 23.80   |
| Yu          | 0             | 18.70    | 17.28     | 13.02    | 7.95      | 24.61   | 24.61   |
| Yu          | 0             | 18.45    | 19.41     | 14.34    | 8.98      | 22.93   |         |
| Yu          | 0             | 15.15    | 17.46     | 13.10    | 7.87      | 23.90   | 23.90   |
| Yu          | 360           | 17.37    | 16.83     | 13.22    | 8.33      | 24.50   | 24.50   |
| Yu          | 360           |          | 16.30     | 12.00    | 5.66      | 21.81   | 21.81   |
| Yu          | 360           | 18.38    | 19.79     | 16.61    | 8.79      | 21.79   |         |
| Yu          | 360           | 17.79    | 18.62     | 15.31    | 8.59      | 25.14   | 25.14   |
| Yu          | 720           | 19.03    | 18.46     | 15.63    | 7.24      | 24.59   | 24.59   |
| Yu          | 720           |          | 17.43     | 14.28    | 6.29      | 21.32   | 21.32   |
| Yu          | 720           |          | 16.15     | 13.07    | 7.18      | 24.24   | 24.24   |
| Yu          | 720           |          | 17.26     | 14.00    | 6.79      | 21.17   | 21.17   |
| Yu          | 720           |          | 17.45     | 13.84    | 7.77      | 23.99   | 23.99   |
| Yu          | 720           |          | 20.13     | 16.63    | 9.47      | 28.13   | 28.13   |
| Yu          | 720           | 16.72    | 17.61     | 14.58    | 8.31      | 24.69   | 24.69   |
| Yu          | 900           | 18.51    | 18.46     | 15.93    | 6.92      | 22.91   | 22.91   |
| Yu          | 900           |          | 18.19     | 15.92    | 8.98      | 22.68   | 22.68   |
| Yu          | 900           |          | 17.53     | 14.30    | 7.68      | 22.67   | 22.59   |
| Yu          | 900           |          | 20.55     | 16.69    | 10.22     | 26.99   | 26.92   |
| Tsuk        | 0             |          | 22.24     | 18.39    | 6.75      | 22.80   | 22.80   |
| Tsuk        | 0             |          |           | 17.09    | 6.81      | 23.35   | 23.35   |
| Tsuk        | 0             | 25.23    | 17.96     | 13.80    | 4.57      | 19.83   | 19.83   |
| Tsuk        | 0             |          | 20.89     | 17.60    | 7.06      | 21.13   | 21.13   |
| Tsuk        | 0             | 29.61    | 23.12     | 18.42    | 10.32     | 25.79   | 25.79   |
| Tsuk        | 360           | 20.83    | 20.31     | 15.58    | 6.08      | 21.65   | 21.65   |
| Tsuk        | 360           | 28.63    | 21.55     | 18.86    | 6.77      | 22.37   | 22.37   |
| Tsuk        | 360           |          | 20.77     | 18.75    | 7.72      | 23.10   | 23.10   |
| Tsuk        | 360           | 26.63    | 19.54     | 16.60    | 6.09      | 22.07   | 22.07   |
| Tsuk        | 360           |          | 18.26     | 16.00    | 5.64      | 21.72   | 21.72   |
| Tsuk        | 360           |          |           | 18.47    | 6.71      | 23.25   | 23.25   |
| Tsuk        | 360           |          | 17.96     | 14.75    | 5.23      | 20.88   | 20.88   |
| Tsuk        | 360           | 28.23    | 21.41     | 18.87    | 7.93      | 22.63   | 22.63   |
| Tsuk        | 360           |          | 17.63     | 14.12    | 5.93      | 21.33   | 21.33   |
| Tsuk        | 360           | 30.36    | 20.99     | 18.50    | 8.76      | 24.25   | 24.25   |
| Tsuk        | 360           |          | 21.60     | 18.31    | 8.18      | 22.44   | 22.44   |
| Tsuk        | 720           |          | 20.05     | 15.76    | 6.65      | 20.71   | 20.71   |
| Tsuk        | 720           |          | 21.92     | 17.91    | 6.89      | 21.36   | 21.36   |
| Tsuk        | 720           |          | 21.40     | 17.73    | 7.43      | 24.28   | 24.28   |
| Tsuk        | 720           | 28.80    | 19.32     | 18.01    | 6.69      | 21.31   | 21.31   |
| Tsuk        | 720           |          | 17.91     | 15.34    | 5.41      | 20.26   | 20.26   |
| Tsuk        | 720           |          | 19.88     | 18.93    | 8.16      | 23.36   | 23.36   |
| Tsuk        | 720           |          | 21.33     | 19.59    | 7.86      | 19.77   |         |
| Tsuk        | 720           |          | 25.17     | 21.07    | 10.83     | 28.54   | 28.54   |
| Tsuk        | 720           |          | 23.55     | 20.32    | 8.68      | 24.21   | 24.21   |
| Tsuk        | 720           | 32.53    | 21.92     | 19.33    | 9.28      | 24.21   | 24.21   |
| Tsuk        | 900           |          | 22.23     | 19.50    | 7.95      | 23.60   | 23.60   |
| Tsuk        | 900           | 29.96    | 22.82     | 20.43    | 9.79      | 25.10   | 25.09   |

**Table S2.** Raw data of potential energy (J/kg) of all included vaults (Yu: Yurchenko; Tsuk: Tsukahara; ° of rotation: Degrees of rotation around longitudinal axis during the second flight phase).

| Vault style | ° of rotation | Board on | Board off | Table on | Table off | 2nd max | Landing |
|-------------|---------------|----------|-----------|----------|-----------|---------|---------|
| Yu          | 0             |          | 13.40     | 17.29    | 23.53     | 27.79   | 10.01   |
| Yu          | 0             | 9.38     | 13.47     | 16.53    | 23.67     | 27.70   | 8.46    |
| Yu          | 0             | 10.10    | 13.69     | 17.89    | 23.35     | 27.99   | 9.87    |
| Yu          | 0             | 10.00    | 13.60     | 19.16    | 23.72     | 26.11   |         |
| Yu          | 0             | 10.37    | 13.86     | 17.67    | 23.81     | 28.13   | 8.42    |
| Yu          | 360           | 9.73     | 13.77     | 17.85    | 23.45     | 27.71   | 8.02    |
| Yu          | 360           |          | 13.42     | 16.36    | 22.67     | 25.24   | 7.32    |
| Yu          | 360           | 10.00    | 13.26     | 17.15    | 23.92     | 28.04   |         |
| Yu          | 360           | 10.38    | 13.69     | 17.15    | 24.05     | 29.72   | 9.28    |
| Yu          | 720           | 9.43     | 13.25     | 16.26    | 23.36     | 27.65   | 8.54    |
| Yu          | 720           |          | 13.72     | 17.16    | 23.82     | 27.03   | 8.09    |
| Yu          | 720           |          | 13.47     | 16.51    | 23.30     | 27.84   | 6.51    |
| Yu          | 720           |          | 13.25     | 15.63    | 22.41     | 25.77   | 6.90    |
| Yu          | 720           |          | 14.00     | 17.34    | 23.62     | 28.17   | 9.40    |
| Yu          | 720           |          | 13.30     | 17.65    | 24.41     | 28.43   | 7.79    |
| Yu          | 720           | 10.34    | 13.73     | 16.49    | 23.58     | 29.51   | 8.07    |
| Yu          | 900           | 9.43     | 13.29     | 15.89    | 23.24     | 27.45   | 8.24    |
| Yu          | 900           |          | 13.02     | 16.05    | 22.83     | 29.08   | 7.88    |
| Yu          | 900           |          | 13.64     | 16.73    | 23.43     | 28.27   | 8.17    |
| Yu          | 900           |          | 13.42     | 18.01    | 23.89     | 28.02   | 7.16    |
| Tsuk        | 0             |          | 12.13     | 14.51    | 22.62     | 25.89   | 8.78    |
| Tsuk        | 0             |          |           | 14.60    | 22.31     | 25.12   | 6.83    |
| Tsuk        | 0             | 10.12    | 12.35     | 14.56    | 22.13     | 24.31   | 7.34    |
| Tsuk        | 0             |          | 12.35     | 14.42    | 22.87     | 26.28   | 8.96    |
| Tsuk        | 0             | 9.73     | 12.33     | 15.66    | 23.93     | 28.96   | 8.52    |
| Tsuk        | 360           | 9.12     | 11.77     | 13.33    | 21.59     | 23.83   | 5.48    |
| Tsuk        | 360           | 9.39     | 12.33     | 13.98    | 22.57     | 25.45   | 7.99    |
| Tsuk        | 360           |          | 12.43     | 13.72    | 22.66     | 26.07   | 7.27    |
| Tsuk        | 360           | 8.92     | 11.69     | 13.30    | 21.70     | 23.54   | 6.25    |
| Tsuk        | 360           |          | 12.41     | 13.68    | 22.96     | 25.82   | 7.14    |
| Tsuk        | 360           |          |           | 14.44    | 23.45     | 26.53   | 7.73    |
| Tsuk        | 360           |          | 11.83     | 13.50    | 22.00     | 23.74   | 5.54    |
| Tsuk        | 360           | 9.77     | 12.36     | 13.67    | 23.26     | 26.86   | 9.23    |
| Tsuk        | 360           |          | 12.44     | 14.82    | 22.10     | 23.85   | 5.45    |
| Tsuk        | 360           | 10.17    | 12.70     | 14.20    | 23.37     | 26.59   | 8.16    |
| Tsuk        | 360           |          | 12.44     | 15.01    | 23.47     | 27.21   | 9.14    |
| Tsuk        | 720           |          | 11.80     | 13.72    | 21.28     | 23.88   | 5.19    |
| Tsuk        | 720           |          | 12.19     | 13.77    | 22.83     | 26.25   | 7.60    |
| Tsuk        | 720           |          | 12.20     | 13.68    | 22.42     | 26.15   | 5.79    |
| Tsuk        | 720           | 9.14     | 11.75     | 12.52    | 21.50     | 23.71   | 6.04    |
| Tsuk        | 720           |          | 12.28     | 14.04    | 22.36     | 25.13   | 5.85    |
| Tsuk        | 720           |          | 13.56     | 14.10    | 23.51     | 27.00   | 6.92    |
| Tsuk        | 720           |          | 12.41     | 13.37    | 23.02     | 25.89   |         |
| Tsuk        | 720           |          | 12.74     | 14.48    | 23.84     | 29.06   | 7.71    |
| Tsuk        | 720           |          | 12.39     | 14.43    | 23.53     | 27.70   | 8.23    |
| Tsuk        | 720           | 9.62     | 12.69     | 14.16    | 22.66     | 26.57   | 8.40    |
| Tsuk        | 900           |          | 12.62     | 14.29    | 23.81     | 27.57   | 7.21    |
| Tsuk        | 900           | 9.42     | 12.11     | 13.27    | 22.87     | 27.39   | 7.32    |

**Table S3.** Raw data of angular kinetic energy (J/kg) of all included vaults (Yu: Yurchenko; Tsuk: Tsukahara; ° of rotation: Degrees of rotation around longitudinal axis during the second flight phase).

| Vault style | ° of rotation | Board on | Board off | Table on | Table off | 2nd max | Landing |
|-------------|---------------|----------|-----------|----------|-----------|---------|---------|
| Yu          | 0             |          | 8.65      | 8.67     | 6.78      | 7.36    | 5.18    |
| Yu          | 0             | 8.44     | 8.06      | 8.11     | 6.50      | 6.90    | 5.59    |
| Yu          | 0             | 9.23     | 8.12      | 7.89     | 6.44      | 8.06    | 6.56    |
| Yu          | 0             | 9.26     | 8.57      | 7.84     | 6.73      | 9.00    |         |
| Yu          | 0             | 9.89     | 9.24      | 9.11     | 5.64      | 7.02    | 5.60    |
| Yu          | 360           | 8.71     | 8.00      | 8.26     | 5.76      | 8.02    | 6.54    |
| Yu          | 360           |          | 8.33      | 8.48     | 6.78      | 8.58    | 7.42    |
| Yu          | 360           | 8.94     | 9.60      | 8.38     | 5.49      | 7.48    |         |
| Yu          | 360           | 9.79     | 9.62      | 9.51     | 5.55      | 7.37    | 6.40    |
| Yu          | 720           | 9.09     | 8.64      | 8.71     | 5.12      | 9.63    | 6.84    |
| Yu          | 720           |          | 8.47      | 7.52     | 7.37      | 9.41    | 8.88    |
| Yu          | 720           |          | 9.01      | 8.30     | 5.26      | 8.98    | 5.62    |
| Yu          | 720           |          | 9.14      | 8.67     | 6.10      | 10.26   | 8.31    |
| Yu          | 720           |          | 8.80      | 8.28     | 7.07      | 10.87   | 8.02    |
| Yu          | 720           |          | 9.76      | 8.66     | 5.81      | 9.90    | 7.32    |
| Yu          | 720           | 10.63    | 10.84     | 10.46    | 5.27      | 9.41    | 5.97    |
| Yu          | 900           | 8.79     | 8.99      | 9.05     | 5.20      | 9.81    | 6.62    |
| Yu          | 900           |          | 9.84      | 9.05     | 5.55      | 10.25   | 6.22    |
| Yu          | 900           |          | 9.46      | 8.63     | 6.21      | 11.24   | 7.10    |
| Yu          | 900           |          | 9.47      | 8.71     | 5.91      | 10.96   | 7.62    |
| Tsuk        | 0             |          | 4.89      | 5.26     | 6.35      | 6.70    | 6.03    |
| Tsuk        | 0             |          |           | 5.40     | 6.51      | 7.62    | 5.84    |
| Tsuk        | 0             | 1.47     | 4.75      | 5.38     | 5.57      | 7.40    | 7.20    |
| Tsuk        | 0             |          | 5.84      | 6.30     | 7.31      | 7.67    | 5.44    |
| Tsuk        | 0             | 2.29     | 6.20      | 6.41     | 4.95      | 5.92    | 4.99    |
| Tsuk        | 360           | 1.42     | 3.83      | 4.70     | 4.71      | 6.93    | 6.46    |
| Tsuk        | 360           | 1.76     | 4.83      | 5.23     | 5.57      | 7.77    | 6.86    |
| Tsuk        | 360           |          | 6.43      | 6.21     | 5.32      | 8.16    | 6.05    |
| Tsuk        | 360           | 1.54     | 5.27      | 5.82     | 5.92      | 8.22    | 6.50    |
| Tsuk        | 360           |          | 5.59      | 5.48     | 6.28      | 7.96    | 7.73    |
| Tsuk        | 360           |          |           | 4.93     | 5.36      | 8.19    | 6.40    |
| Tsuk        | 360           |          | 4.06      | 4.55     | 3.89      | 6.66    | 6.25    |
| Tsuk        | 360           | 2.23     | 5.01      | 5.20     | 5.48      | 7.40    | 6.17    |
| Tsuk        | 360           |          | 4.90      | 5.43     | 4.93      | 7.57    | 7.48    |
| Tsuk        | 360           | 2.41     | 5.90      | 6.33     | 6.54      | 8.04    | 6.18    |
| Tsuk        | 360           |          | 6.10      | 6.11     | 6.69      | 8.85    | 7.44    |
| Tsuk        | 720           |          | 4.46      | 5.05     | 4.72      | 7.87    | 7.27    |
| Tsuk        | 720           |          | 4.99      | 5.51     | 4.89      | 8.94    | 6.78    |
| Tsuk        | 720           |          | 6.78      | 6.83     | 5.27      | 9.13    | 7.44    |
| Tsuk        | 720           | 1.49     | 5.63      | 5.94     | 6.03      | 9.49    | 7.88    |
| Tsuk        | 720           |          | 5.32      | 5.14     | 5.70      | 9.08    | 8.37    |
| Tsuk        | 720           |          | 5.39      | 5.50     | 4.91      | 8.57    | 7.63    |
| Tsuk        | 720           |          | 5.10      | 5.06     | 5.49      | 9.57    |         |
| Tsuk        | 720           |          | 6.13      | 6.78     | 4.57      | 8.53    | 5.43    |
| Tsuk        | 720           |          | 5.49      | 5.82     | 5.43      | 10.19   | 7.10    |
| Tsuk        | 720           | 1.21     | 5.43      | 6.44     | 5.47      | 9.09    | 6.20    |
| Tsuk        | 900           |          | 6.04      | 6.90     | 5.37      | 10.26   | 7.96    |
| Tsuk        | 900           | 1.49     | 5.80      | 6.66     | 5.06      | 9.20    | 5.97    |

**Table S4.** Raw data of total energy (J/kg) of all included vaults (Yu: Yurchenko; Tsuk: Tsukahara; ° of rotation: Degrees of rotation around longitudinal axis during the second flight phase).

| Vault style | ° of rotation | Board on | Board off | Table on | Table off | 2nd max | Landing |
|-------------|---------------|----------|-----------|----------|-----------|---------|---------|
| Yu          | 0             |          | 38.07     | 39.17    | 37.17     | 38.64   | 36.97   |
| Yu          | 0             | 36.99    | 39.48     | 39.82    | 36.71     | 39.31   | 37.84   |
| Yu          | 0             | 38.04    | 39.09     | 38.81    | 37.75     | 41.58   | 41.04   |
| Yu          | 0             | 37.72    | 41.58     | 41.33    | 39.44     | 42.58   |         |
| Yu          | 0             | 35.41    | 40.56     | 39.88    | 37.31     | 39.01   | 37.93   |
| Yu          | 360           | 35.82    | 38.59     | 39.34    | 37.54     | 40.06   | 39.06   |
| Yu          | 360           |          | 38.06     | 36.83    | 35.11     | 38.33   | 36.56   |
| Yu          | 360           | 37.33    | 42.66     | 42.14    | 38.21     | 40.37   |         |
| Yu          | 360           | 37.95    | 41.92     | 41.97    | 38.19     | 41.25   | 40.82   |
| Yu          | 720           | 37.55    | 40.34     | 40.60    | 35.72     | 42.04   | 39.97   |
| Yu          | 720           |          | 39.61     | 38.96    | 37.47     | 40.57   | 38.30   |
| Yu          | 720           |          | 38.64     | 37.88    | 35.73     | 39.22   | 36.37   |
| Yu          | 720           |          | 39.64     | 38.30    | 35.30     | 41.51   | 36.37   |
| Yu          | 720           |          | 40.25     | 39.47    | 38.46     | 43.10   | 41.41   |
| Yu          | 720           |          | 43.18     | 42.94    | 39.68     | 44.14   | 43.24   |
| Yu          | 720           | 37.69    | 42.18     | 41.54    | 37.16     | 41.72   | 38.73   |
| Yu          | 900           | 36.73    | 40.74     | 40.87    | 35.35     | 41.58   | 37.77   |
| Yu          | 900           |          | 41.05     | 41.02    | 37.36     | 41.87   | 36.78   |
| Yu          | 900           |          | 40.62     | 39.66    | 37.33     | 43.32   | 37.86   |
| Yu          | 900           |          | 43.45     | 43.41    | 40.02     | 44.99   | 41.71   |
| Tsuk        | 0             |          | 39.27     | 38.16    | 35.72     | 37.91   | 37.62   |
| Tsuk        | 0             |          |           | 37.09    | 35.63     | 37.43   | 36.02   |
| Tsuk        | 0             | 36.81    | 35.07     | 33.74    | 32.27     | 34.87   | 34.37   |
| Tsuk        | 0             |          | 39.08     | 38.32    | 37.25     | 37.81   | 35.53   |
| Tsuk        | 0             | 41.63    | 41.65     | 40.48    | 39.21     | 40.05   | 39.30   |
| Tsuk        | 360           | 31.38    | 35.91     | 33.61    | 32.38     | 34.90   | 33.58   |
| Tsuk        | 360           | 39.79    | 38.72     | 38.07    | 34.90     | 38.73   | 37.21   |
| Tsuk        | 360           |          | 39.63     | 38.68    | 35.71     | 38.28   | 36.43   |
| Tsuk        | 360           | 37.09    | 36.49     | 35.72    | 33.71     | 37.36   | 34.83   |
| Tsuk        | 360           |          | 36.26     | 35.15    | 34.88     | 36.74   | 36.58   |
| Tsuk        | 360           |          |           | 37.84    | 35.52     | 39.91   | 37.37   |
| Tsuk        | 360           |          | 33.85     | 32.81    | 31.12     | 34.74   | 32.67   |
| Tsuk        | 360           | 40.23    | 38.78     | 37.74    | 36.67     | 39.18   | 38.03   |
| Tsuk        | 360           |          | 34.97     | 34.37    | 32.96     | 35.63   | 34.25   |
| Tsuk        | 360           | 42.94    | 39.59     | 39.03    | 38.67     | 40.04   | 38.58   |
| Tsuk        | 360           |          | 40.15     | 39.43    | 38.35     | 40.68   | 39.02   |
| Tsuk        | 720           |          | 36.31     | 34.52    | 32.65     | 37.85   | 33.17   |
| Tsuk        | 720           |          | 39.11     | 37.19    | 34.60     | 40.61   | 35.74   |
| Tsuk        | 720           |          | 40.37     | 38.23    | 35.12     | 38.57   | 37.51   |
| Tsuk        | 720           | 39.42    | 36.69     | 36.47    | 34.21     | 38.30   | 35.23   |
| Tsuk        | 720           |          | 35.51     | 34.52    | 33.47     | 37.79   | 34.48   |
| Tsuk        | 720           |          | 38.83     | 38.53    | 36.58     | 41.66   | 37.91   |
| Tsuk        | 720           |          | 38.84     | 38.02    | 36.36     | 40.78   |         |
| Tsuk        | 720           |          | 44.04     | 42.33    | 39.24     | 42.91   | 41.69   |
| Tsuk        | 720           |          | 41.43     | 40.58    | 37.64     | 42.11   | 39.54   |
| Tsuk        | 720           | 43.35    | 40.04     | 39.93    | 37.42     | 42.04   | 38.82   |
| Tsuk        | 900           |          | 40.89     | 40.68    | 37.13     | 42.22   | 38.77   |
| Tsuk        | 900           | 40.87    | 40.73     | 40.36    | 37.72     | 42.75   | 38.39   |
